# Supplementary material
Source: publisher figshare collection journal article supplement (https://springernature.figshare.com/ndownloader/files/13355876)
Supplement: Supplementary file [file 13355876]

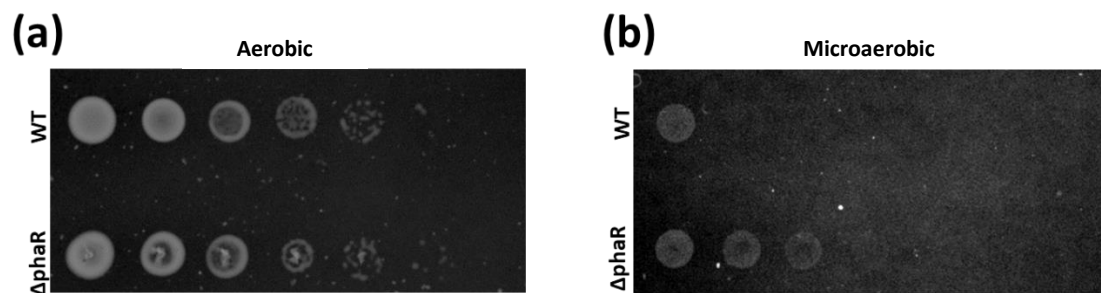

Fig. S2. Colony formation of *B. diazoefficiens* under aerobic (a) and microaerobic (b) conditions. Cultures of *B. diazoefficiens* strains USDA110 (WT) and  $\Delta$ phaR ( $OD_{600} = 0.1$ ) were serially diluted 10 times, spotted on to TY plates, and grown under aerobic (a) and anaerobic (b) conditions at 28 °C. Pictures were taken after 5 (a) and 19 (b) days of incubation.
